# Supplementary material for: Use of rare earth elements as tracers for soil–plant transfer of trace elements
Source: Research Square preprint supplement (doi:10.21203/rs.3.rs-1319944/v1), 2022-02-07
Supplement: Supplementary file 1 [file 8e8818a36d8b6662ef9f35ba.docx]

**Use of rare earth elements as tracers for soil–plant transfer of trace elements**

Bryan Arbalestrie1, Julie Falys1, Nathan Bemelmans1, Adil Thami1, Yannick Agnan1*

1Earth and Life Institute, Université catholique de Louvain, 1348 Louvain-la-Neuve, Belgium

**Electronic supplementary material**


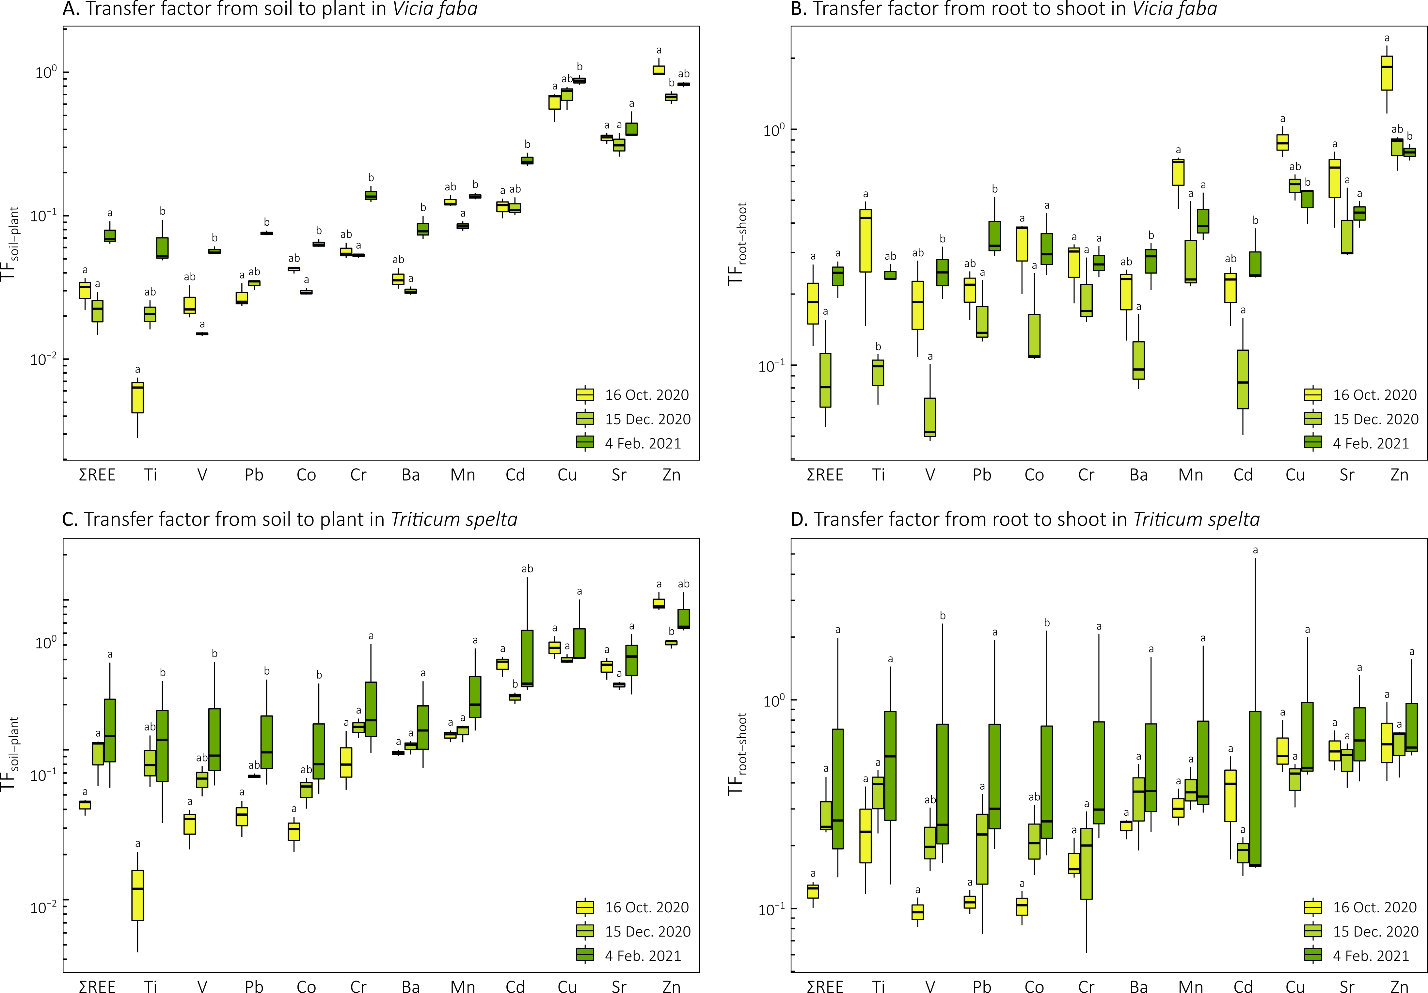


Figure S1. Transfer factors from soil to plant (TFsoil-plant; A and C) and from root to shoot (TFroot-shoot; B and D) of trace elements and sum of rare earth elements (ΣREE) in bean (*Vicia faba*; A-B) and spelt (*Triticum spelta*; C-D) collected at three sampling dates at the centre de Marbaix. Letters indicate statistically significant differences between sampling dates.
