# Supplementary material for: Use of rare earth elements as tracers for soil–plant transfer of trace elements
Source: Research Square preprint supplement (doi:10.21203/rs.3.rs-1319944/v1), 2022-02-07
Supplement: Supplementary file 2 [file e27d5db05b7161c19c842125.xlsx]

## Sheet: Table S1
Matrix	Compartment	Species	Sampling date	Sub-area	unit	Ba	Cd	Co	Cr	Cu	Mn	Pb	Sr	Ti	V	Zn	La	Ce	Pr	Nd	Sm	Eu	Gd	Tb	Dy	Ho	Er	Tm	Yb	Lu	ΣREE	LREE/HREE	Ce anomaly	Eu anomaly	Tb anomaly
soil	0-30 cm		Oct. 16, 2020	A	µg kg−1	218086	329.534	9263.18	59774.1	15248.2	336903	21497.8	35760.9	2.25505e+06	67603.6	46053	20558.2	46978	5708.24	22063.4	4218.48	709.768	3590.6	448.364	2574.22	468.154	1298.59	187.374	1144.57	163.487	110112	1.2241	1.01651	0.79074	0.82239
soil	0-30 cm		Oct. 16, 2020	B	µg kg−1	236950	297.978	9480.62	60389.9	12985.9	312696	20174.2	40022.3	2.26524e+06	66980.3	46569.7	24079.4	54616.1	6422.59	24702.9	4564.74	764.846	3915.44	463.14	2709.45	502.552	1403.66	196.285	1267.43	185.606	125794	1.27486	1.03122	0.784425	0.790669
soil	0-30 cm		Oct. 16, 2020	C	µg kg−1	234879	350.121	8279.24	53786.1	12909.2	294339	22570.2	37436.5	1.56916e+06	58157.6	44747.3	18556.4	41786.6	4975.23	19158.5	3689.25	657.396	3155.3	389.536	2182.5	406.374	1158.5	165.469	1053.79	158.861	97493.7	1.22207	1.02096	0.835439	0.825367
soil	30-50 cm		Oct. 16, 2020	A	µg kg−1	236346	209.063	9749.6	61669	13045.2	338057	16131.2	38605.5	2.67672e+06	66654.1	37905	21612.2	49671.3	6094.76	23707.8	4494.47	719.637	3682.39	467.966	2722.22	503.942	1400.76	201.798	1234.64	179.394	116693	1.21569	1.01368	0.766848	0.826048
soil	30-50 cm		Oct. 16, 2020	B	µg kg−1	218190	165.995	10618.1	66007.1	13149.7	284979	15449.1	30888	2.98468e+06	70631	37278.6	19468.7	45298.7	5405.59	21284.7	4206.07	691.246	3541.92	447.075	2642.39	492.376	1337.16	196.887	1258.58	179.325	106451	1.14061	1.03504	0.776511	0.817239
soil	30-50 cm		Oct. 16, 2020	C	µg kg−1	223824	153.923	7576.09	60692.9	10522.9	167063	13836.9	26640	2.15537e+06	56282.2	32927.7	17458.3	40153.7	4942.5	19459.6	3851.22	765.686	3394.77	413.961	2367.02	432.811	1183.49	172.441	1073	155.12	95823.5	1.19354	1.01225	0.918033	0.812538
plant	root	Trifolium resupinatum	Oct. 16, 2020	A	µg kg−1	32288.5	493.893	1009.89	10479.6	16579	61734.4	2133.37	32999.5	34893	9038.12	53394.7	2701.52	5152.09	656.623	2678.52	554.786	112.007	543.374	65.533	393.748	74.9192	212.8	30.5169	199.935	29.0557	13405.4	0.973926	0.910541	0.882349	0.790683
plant	root	Trifolium resupinatum	Oct. 16, 2020	B	µg kg−1	31161.9	314.919	946.943	8749.71	12931	47791.9	1978.01	23842.8	28549.7	8518.99	69504	2929.63	5794.88	668.756	2575.14	505.843	96.1631	490.827	57.8267	333.271	63.4159	177.539	25.6012	168.173	24.6566	13911.7	1.11509	0.974929	0.834992	0.793709
plant	root	Trifolium resupinatum	Oct. 16, 2020	C	µg kg−1	28792.6	263.07	890.428	9823.07	12099.3	56958.7	2194.17	20852	21200.2	6769.47	214399	2498.98	4952.72	568.158	2187.35	407.098	79.9525	409.688	48.8308	288.639	54.977	155.366	23.1509	143.247	22.113	11840.3	1.08166	0.978801	0.845885	0.790768
plant	root	Trifolium resupinatum	Dec. 15, 2020	A	µg kg−1	35625.4	590.681	1464.5	17833.1	22592.7	112347	3813.67	28681.1	106013	11548.1	44565.2	3315.09	6385.34	824.716	3288.87	666.762	127.707	645.407	82.5448	497.321	95.3269	270.679	39.1503	246.585	36.2834	16521.8	0.944837	0.90862	0.842353	0.816431
plant	root	Trifolium resupinatum	Dec. 15, 2020	B	µg kg−1	43096.7	567.723	1416.31	14238.8	17809.7	68696.2	3264.55	27503	151858	16270.4	54049.3	4003.46	8192.01	977.702	3806.99	754.163	136.889	702.643	91.8504	554.804	108.058	300.546	45.0623	278.873	42.2172	19995.3	0.980469	0.974574	0.814525	0.825463
plant	root	Trifolium resupinatum	Dec. 15, 2020	C	µg kg−1	37301.4	536.745	1406.61	15777.5	18275.6	76135.9	3488.53	25451.7	233983	12038.7	46057.3	3286.86	6638.49	800.869	3126.84	611.427	113.247	572.491	72.6107	434.125	82.7311	231.048	33.4819	212.722	32.3031	16249.3	1.03482	0.963074	0.828997	0.815366
plant	root	Trifolium resupinatum	Feb, 4, 2021	A	µg kg−1	67805	686.022	1992.89	23209.3	23276.2	130421	4726.37	38953.1	580658	18280.4	68105.4	7035.52	14216.5	1726.92	6781.85	1336.78	247.562	1261.35	164.535	940.574	183.063	522.256	75.1454	486.063	74.274	35052.4	0.999851	0.959885	0.825539	0.844728
plant	root	Trifolium resupinatum	Feb, 4, 2021	B	µg kg−1	59238.7	471.763	1729.96	23173.7	21380.3	101670	4079.36	37508.2	355130	17984.8	75493.2	5965.54	12494.5	1446.08	5634.79	1078.67	199.159	998.799	126.15	741.171	141.784	401.693	58.8064	382.818	56.8857	29726.9	1.06901	1.00137	0.831205	0.819631
plant	root	Trifolium resupinatum	Feb, 4, 2021	C	µg kg−1	58065.1	779.61	1596.24	21079.6	23364.6	86022.1	4608.53	35829.8	370441	17614.3	67381.3	6352.92	12969.5	1510.09	5810.95	1108.43	192.391	1005.84	129.504	711.67	137.88	384.325	54.9617	364.486	54.1498	30787.1	1.13198	0.98589	0.789626	0.852684
plant	root	Triticum spelta	Oct. 16, 2020	A	µg kg−1	78199.1	586.805	2309.32	20939.6	13618.6	126546	5981.62	25831.9	85717.1	17901.3	84604.8	7781.22	15974.7	1974.33	7827.57	1568.55	296.74	1465.39	183.492	1080.05	206.525	586.535	86.849	551.777	81.5254	39665.3	1.01479	0.958516	0.84773	0.814978
plant	root	Triticum spelta	Oct. 16, 2020	B	µg kg−1	110137	291.051	3251.52	34224.9	11551.6	168138	8620.58	25552.8	122434	27761.5	103502	7984.35	17485.1	2167.69	8703.77	1763.69	333.034	1567.31	204.607	1215.57	235.816	686.962	98.4957	641.813	96.2319	43184.5	0.98286	0.98617	0.868316	0.830965
plant	root	Triticum spelta	Oct. 16, 2020	C	µg kg−1	82221.7	272.5	2021.28	32870.1	9207.87	99307.6	6800.85	19364	79506.2	17796.9	39439.6	7132.06	14799	1699.64	6532.99	1242	229.512	1133.02	136.368	806.643	153.81	447.421	63.3939	409.32	61.0676	34846.3	1.14449	1.00076	0.838384	0.795008
plant	root	Triticum spelta	Dec. 15, 2020	A	µg kg−1	124125	464.31	3646.47	158060	18899.8	163783	19758.3	26679	778773	28702.8	57834.6	9508.56	20713	2425.9	9377.12	1818.51	336.402	1673.44	209.059	1347.6	235.817	687.056	100.8	645.028	100.267	49178.5	1.03922	1.01411	0.835493	0.781926
plant	root	Triticum spelta	Dec. 15, 2020	B	µg kg−1	60646.5	355.422	1863.81	35971.1	11429.4	97222.9	5864.47	18517.2	325322	16568.2	32038.7	6224.83	12862.8	1536.03	5971.64	1162.57	208.051	1032.75	131.892	771.914	147.525	410.433	60.1067	385.352	59.6482	30965.5	1.09101	0.978898	0.823079	0.826185
plant	root	Triticum spelta	Dec. 15, 2020	C	µg kg−1	54337.7	384.369	1706.9	26173.1	11348.3	87077.6	4123.66	16582	424411	14853.9	33868.2	5151.15	10411	1278.68	4981.45	1009.48	188.791	939.878	120.598	725.591	134.893	386.555	56.8191	363.838	54.4578	25803.2	0.996765	0.954507	0.839531	0.818409
plant	root	Triticum spelta	Feb, 4, 2021	A	µg kg−1	80244.5	580.189	2837.44	31569.9	13136.1	195949	6875.28	23449.6	489637	24541.2	56339.4	10305.6	21080.4	2522.79	9914.87	1977.17	372.106	1873.14	240.427	1385.6	266.152	739.211	108.078	679.032	105.312	51569.9	1.0215	0.973037	0.837174	0.834099
plant	root	Triticum spelta	Feb, 4, 2021	B	µg kg−1	76937.6	461.555	2682.08	26482.5	12113.6	145915	6113.64	23021.5	562147	23453.9	49289.9	10116.2	21014.4	2406.26	9224.3	1780.81	320.355	1661.57	213.233	1231.67	237.891	664.015	97.4734	615.696	94.294	49678.2	1.06731	1.00283	0.806646	0.833193
plant	root	Triticum spelta	Feb, 4, 2021	C	µg kg−1	41753.8	103.54	1065.79	13212.2	6491.91	76757.9	3416.79	16822.9	311781	9660.45	32043.1	3853.16	7894.96	894.07	3418.94	649.083	119.431	626.243	81.8715	488.702	95.0341	273.29	39.8622	261.671	40.0786	18736.4	0.988087	1.00165	0.810625	0.829884
plant	root	Vicia faba	Oct. 16, 2020	A	µg kg−1	74304.1	295.411	1827.37	21229.3	9003.43	101893	4671.71	29592.7	43306.2	13847.4	38529.5	6766.19	13919.9	1653.51	6371.82	1230.3	226.828	1165.75	142.521	832.427	158.143	451.123	64.3469	415.637	61.0716	33459.6	1.0862	0.979498	0.820055	0.806535
plant	root	Vicia faba	Oct. 16, 2020	B	µg kg−1	36264.3	153.03	1053.66	10803.3	8847.32	50234.5	2312.96	18738	29045.5	7912.24	24415.1	2966.2	6208.08	724.131	2789.09	543.29	104.409	531.64	68.2619	409.763	78.2288	226.286	33.7314	212.217	31.9145	14927.2	0.972219	0.997003	0.840304	0.819548
plant	root	Vicia faba	Oct. 16, 2020	C	µg kg−1	28673.7	128.615	950.946	8414.75	10079.3	46953.2	2124.39	19163.3	27729.4	6130.31	24801.3	2431.52	4918.95	548.981	2117.87	399.08	76.6693	391.946	48.1222	292.338	55.5516	164.248	24.0172	153.35	23.5787	11646.2	1.03097	1.00257	0.838387	0.795004
plant	root	Vicia faba	Dec. 15, 2020	A	µg kg−1	73038.6	712.644	2436.09	19108.5	16642.6	122566	5533.73	37692.4	586431	20051.4	41460.5	5853.45	11871.5	1545.05	6202.57	1264.99	253.568	1178.79	160.093	970.746	189.18	545.698	76.7754	490.9	73.1519	30676.4	0.909651	0.927266	0.899427	0.841433
plant	root	Vicia faba	Dec. 15, 2020	B	µg kg−1	84020.2	473.865	2520.74	20238	17525	114051	5580.73	34540.3	537272	20382.3	35018.5	6529.59	13740.6	1688.61	6655.56	1306.91	256.379	1220.43	161.389	989.725	190.603	545.709	81.5843	519.996	77.4616	33964.6	0.946938	0.972676	0.879253	0.825058
plant	root	Vicia faba	Dec. 15, 2020	C	µg kg−1	42025.9	223.247	1058.9	10068.9	14923.3	54209.8	2992.01	24994.3	290193	8642.11	35692.4	3746.3	7575.31	902.858	3478.53	672.371	123.428	637.954	81.0988	473.537	89.0372	252.144	36.529	233.469	36.835	18339.4	1.04852	0.969657	0.815925	0.824863
plant	root	Vicia faba	Feb, 4, 2021	A	µg kg−1	75231	305.283	2157.82	30130.8	22844.2	125301	4999.05	38491.9	474391	16720.5	45407.7	8621.33	15822.7	2125.37	8311.25	1609.82	269.672	1464.64	185.488	1036.74	195.784	551.916	78.4077	510.292	77.6454	40861	1.08959	0.869862	0.761058	0.838567
plant	root	Vicia faba	Feb, 4, 2021	B	µg kg−1	88519	348.276	2379.63	34699.1	22493.1	124649	5457.22	37931.7	514830	19437.7	53952.7	8157.47	17597.2	2038.49	7907.51	1542.19	274.473	1401.26	183.754	1081.43	211.167	597.841	86.6467	568.587	87.2668	41735.3	1.01814	1.01524	0.809127	0.836534
plant	root	Vicia faba	Feb, 4, 2021	C	µg kg−1	49232.6	219.052	1163.65	25037.5	28269.3	71061.9	3193.19	30969.8	548287	9888.57	42960.6	4985.5	10242.9	1191.15	4564.57	866.631	147.844	783.299	100.643	568.323	110.267	316.211	48.3515	313.431	48.6737	24287.8	1.07536	0.989595	0.777686	0.841902
plant	shoot	Trifolium resupinatum	Oct. 16, 2020	A	µg kg−1	15767.4	48.9432	321.307	3602.79	6900.68	45567.5	667.226	27902.8	19799.3	2053.3	40635	998.994	2004	228.355	885.376	167.622	30.2618	166.272	19.3174	117.973	22.8732	63.539	9.36528	60.3745	8.98017	4783.3	1.06089	0.988054	0.783658	0.768515
plant	shoot	Trifolium resupinatum	Oct. 16, 2020	B	µg kg−1	15118.7	41.5246	368.519	3428.35	5828.91	37276.9	733.542	23829.8	12195	2505.11	71536.8	960.039	1975.78	220.124	862.073	170.215	31.37	157.992	18.743	114.544	22.1291	65.1227	9.22867	59.7837	9.24644	4676.39	1.06649	1.01212	0.828646	0.777595
plant	shoot	Trifolium resupinatum	Oct. 16, 2020	C	µg kg−1	12422.6	38.4151	267.677	2688.33	6320.35	35290.2	855.458	25302.1	4947.43	1697.84	70897.6	692.264	1394.48	157.885	616.982	115.269	22.2518	108.871	12.498	79.7144	15.7701	45.9377	7.1236	45.709	6.65177	3321.41	1.05351	0.993289	0.86009	0.749277
plant	shoot	Trifolium resupinatum	Dec. 15, 2020	A	µg kg−1	24104.9	73.1113	448.311	6621.97	7887.67	39933	1208.56	31543.4	171397	3313.73	32324.9	1730.72	3559.75	425.98	1632.1	320.588	52.4754	292.121	35.9325	209.777	39.7693	107.85	15.7913	102.828	15.7283	8541.41	1.10179	0.975662	0.743064	0.809532
plant	shoot	Trifolium resupinatum	Dec. 15, 2020	B	µg kg−1	26053.5	66.842	509.732	6261.02	6803.22	38029.2	1419.55	29236.2	156673	4049.22	29906.4	1528.96	3224.39	383.606	1494.69	303.66	59.8239	287.748	37.4418	235.504	43.6441	131.398	20.0191	127.668	19.5499	7898.1	0.911297	0.990432	0.876248	0.808452
plant	shoot	Trifolium resupinatum	Dec. 15, 2020	C	µg kg−1	19989.8	41.4273	405.047	9500.81	8881.87	31785.8	1253.56	24984.3	121181	3134.78	30997.7	1341.11	2818.22	327.069	1258.61	228.919	43.6454	208.479	26.8876	158.599	30.9178	87.3961	13.3403	87.4239	13.5843	6644.2	1.07562	1.00156	0.865756	0.827943
plant	shoot	Trifolium resupinatum	Feb, 4, 2021	A	µg kg−1	32536.6	82.318	780.307	9124.82	10760	61219.4	2119.18	31350.2	267122	5801.54	48390.7	2729.24	5735.3	671.219	2612.71	519.416	91.909	468.9	60.5052	354.548	68.6686	196.362	29.5262	191.974	28.2869	13758.6	1.02059	0.997236	0.807143	0.830577
plant	shoot	Trifolium resupinatum	Feb, 4, 2021	B	µg kg−1	21885.2	51.6273	491.604	5274.52	9439.65	40841	1237.03	27843.2	189164	3627.02	49428.4	1471.25	3050.19	350.169	1337.08	263.671	49.5248	241.646	32.0048	183.783	37.4484	105.427	17.2381	102.059	16.0821	7257.57	0.989803	1.00054	0.850126	0.850344
plant	shoot	Trifolium resupinatum	Feb, 4, 2021	C	µg kg−1	28756.5	69.2873	693.214	8649.6	10313.9	52268.9	2050.52	25004.4	233057	5308.78	45609.7	2766.7	5562.5	634.401	2394.88	448.782	81.9192	409.186	51.298	298.065	59.5326	167.612	26.0432	169.53	26.9084	13097.4	1.08501	0.988727	0.828379	0.82007
plant	shoot	Triticum spelta	Oct. 16, 2020	A	µg kg−1	20683.2	100.748	191.866	3229.94	6124.24	37995.9	562.947	14625.8	10040.4	1461.31	51824.8	830.097	1693.66	197.98	767.558	143.655	26.4726	134.493	14.8242	84.8144	15.6162	42.0808	5.98229	38.5682	5.8357	4001.64	1.29686	0.98363	0.824843	0.764937
plant	shoot	Triticum spelta	Oct. 16, 2020	B	µg kg−1	23617	115.271	336.931	4809.95	6210.64	41999.6	922.214	11728.1	47054.8	2661.3	42226	1191.15	2446.47	281.285	1071.18	208.964	37.8911	196.466	23.5315	144.639	27.2213	77.6534	11.6833	72.5112	10.6734	5801.32	1.07609	0.99518	0.809838	0.77993
plant	shoot	Triticum spelta	Oct. 16, 2020	C	µg kg−1	21335.3	146.158	244.859	7175.15	7382.19	37283.7	833.576	13819.7	18540.9	2007.57	38453.8	897.889	1848.31	207.207	797.171	150.202	27.3553	141.878	17.3897	106.808	20.7233	62.2541	9.05257	58.8232	8.7167	4353.78	1.03368	1.00909	0.8114	0.790453
plant	shoot	Triticum spelta	Dec. 15, 2020	A	µg kg−1	23543.2	66.4578	526.707	9654.19	5767.19	48704	1493	10113	178201	4341.07	24533.7	2451.45	5117.23	603.629	2293.3	440.465	71.4418	402.101	50.0093	290.904	53.9197	150.544	22.9716	151.145	23.3238	12122.4	1.09299	0.989973	0.735598	0.815936
plant	shoot	Triticum spelta	Dec. 15, 2020	B	µg kg−1	22029	67.8947	383.323	7206.38	5628.96	35053.2	1327.01	10063.3	128367	3272.31	22038	1476.68	3067.07	358.115	1342.23	247.391	43.4435	227.311	28.8133	164.632	30.724	85.1568	12.4124	81.236	12.4086	7177.62	1.16	0.9928	0.793749	0.831207
plant	shoot	Triticum spelta	Dec. 15, 2020	C	µg kg−1	26785.9	84.2717	535.198	7642.12	5029.72	41573.2	1460.13	10249.9	195360	4521	23743.2	2222.28	4568.33	550.138	2143.92	415.881	67.0034	376.621	47.9517	274.132	52.1268	146.503	21.8234	141.19	22.1781	11050.1	1.05996	0.972218	0.733719	0.833133
plant	shoot	Triticum spelta	Feb, 4, 2021	A	µg kg−1	29325.8	90.9938	741.898	9403.22	6204.38	67423.3	2065.79	14979.3	262502	6178.88	30505.9	2743.06	5700.15	662.039	2544.46	490.333	92.8716	469.755	60.3977	353.509	68.9188	195.865	28.3896	191.938	29.7786	13631.5	1.00308	0.995744	0.837568	0.82931
plant	shoot	Triticum spelta	Feb, 4, 2021	B	µg kg−1	17848.6	74.5755	482.037	5756.03	5312.26	42029.5	1181.48	9360.97	73239.9	3867.04	29118.8	1395	2942.22	333.191	1300.32	259.007	46.684	247.996	32.6985	194.252	37.2347	100.658	15.171	96.3297	14.6678	7015.43	0.978588	1.01605	0.79729	0.835584
plant	shoot	Triticum spelta	Feb, 4, 2021	C	µg kg−1	67271.1	497.286	2289.19	27291.9	12995.1	139695	6631.55	22113.9	450531	22436	50205.9	7666.85	15570.3	1779.41	6832.97	1307.63	246.443	1242.12	162.505	945.796	181.584	623.671	74.3614	466.665	70.2009	37170.5	1.02403	0.992686	0.837173	0.839537
plant	shoot	Vicia faba	Oct. 16, 2020	A	µg kg−1	9441.68	43.3107	366.032	3877.52	6852.81	46839.8	727.954	11314.2	6334.23	1501.45	44901	852.236	1687.15	198.806	756.793	141.742	24.8178	133.682	14.605	94.017	17.847	50.8726	7.22126	47.2982	7.26992	4034.36	1.14073	0.965183	0.780698	0.725369
plant	shoot	Vicia faba	Oct. 16, 2020	B	µg kg−1	8399.53	35.3089	410.188	3275.53	9108.9	36528.8	506.751	15053.6	14345.9	2194.24	44874.3	599.398	1159.48	131.296	497.238	95.661	17.5595	89.7457	10.1515	67.9458	12.808	36.6124	5.43802	35.2588	5.47137	2764.06	1.07882	0.973061	0.820733	0.727686
plant	shoot	Vicia faba	Oct. 16, 2020	C	µg kg−1	7281.15	33.5346	362.158	2733.91	8780.08	35579.8	529.994	13171.8	11663.5	1135.84	56116.5	687.949	1338.01	146.898	544.159	98.7473	17.2516	96.5646	10.7273	68.9913	12.9097	37.5971	5.39632	37.3827	5.59245	3108.17	1.13636	0.990549	0.764172	0.732695
plant	shoot	Vicia faba	Dec. 15, 2020	A	µg kg−1	7000.01	36.0347	266.4	3240.8	8297.03	26457.9	758.484	11071.4	58007	1042.46	27643	502.18	1026.96	126.047	461.977	86.1473	15.0402	80.4732	10.6748	67.5743	12.5721	35.8863	5.29929	37.4589	5.47746	2473.77	0.976753	0.960223	0.782375	0.814509
plant	shoot	Vicia faba	Dec. 15, 2020	B	µg kg−1	6659.9	39.9993	267.747	3073.79	10255.1	26320.3	702.97	10329	36512.4	973.29	31327.1	377.659	756.01	90.2901	337.625	64.0603	12.253	71.4565	8.70388	54.8648	10.4351	31.2084	4.69187	31.0536	4.75134	1855.06	0.857968	0.963889	0.778117	0.778786
plant	shoot	Vicia faba	Dec. 15, 2020	C	µg kg−1	6920.35	35.4578	260.104	2877.58	9592.78	26864.8	687.121	14130.2	32396.2	873.169	33008.5	619.596	1221.23	141.409	533.891	97.6093	14.5599	87.9271	9.79295	53.7782	9.93571	30.782	4.22213	27.0901	4.78117	2856.6	1.29082	0.971568	0.681168	0.782192
plant	shoot	Vicia faba	Feb, 4, 2021	A	µg kg−1	21769.3	73.2295	636.653	9631.38	12479	48651.8	1603.44	19076.5	110002	4133.68	36204.2	2038.23	4235.89	496.612	1881.68	371.705	60.7205	337.763	42.1665	243.08	56.3837	137.433	19.767	125.102	19.7591	10066.3	1.04372	0.990993	0.742637	0.820854
plant	shoot	Vicia faba	Feb, 4, 2021	B	µg kg−1	18446.7	81.9189	573.311	8208.16	12408.2	42299.1	1587.37	14508.2	118862	3703.79	39741	1665.05	3396.04	390.295	1495.71	288.274	48.5371	253.525	33.0106	187.844	35.7391	104.758	15.437	101.319	15.1766	8030.72	1.09729	0.99198	0.778361	0.845532
plant	shoot	Vicia faba	Feb, 4, 2021	C	µg kg−1	16217.1	83.2608	514.208	6690.92	11177.7	38283.8	1649.87	13720	147085	3144.3	37085.2	1378.98	2787.91	328.04	1256.6	244.23	43.0439	221.164	28.536	164.56	31.3154	86.6879	13.4267	81.1602	12.9312	6678.59	1.08197	0.975951	0.802649	0.836342
earthworm			Feb, 4, 2021	A	µg kg−1	3250.56	7207.78	4315.43	651.208	7328.58	32347.1	696.518	11905.8	12758.5	720.394	340448	250.467	290.832	54.3794	227.746	44.7022	10.3696	52.3289	6.99206	44.4995	8.98678	27.1731	3.43732	22.4049	3.5076	1047.83	0.712359	0.586629	0.917939	0.815655
earthworm			Feb, 4, 2021	B	µg kg−1	2206.76	6564.85	3422.48	770.205	7176.11	13031.2	317.095	6068.49	13519.6	706.604	340266	204.522	318.438	43.408	169.771	36.0064	7.84683	38.6538	5.12287	31.1546	7.17598	18.5941	2.46678	13.5744	2.17761	898.913	0.827628	0.795288	0.90587	0.829193
earthworm			Feb, 4, 2021	C	µg kg−1	2376.79	5651.41	2748.52	625.34	6981.12	13600.9	408.909	7400.67	14817.1	709.703	324514	235.577	360.328	52.589	214.794	50.7518	9.1486	72.0151	14.0757	103.112	22.1937	66.6135	9.33505	53.8566	7.75378	1272.14	0.318907	0.762286	0.635275	0.904899
soil extraction	0-30 cm		Oct. 16, 2020	A	µg kg−1	235.281	0.108105	0.236958	1.48877	8.98907	10.5214	0.448442	13.2285	18.4915	10.2793	169.316	0.609421	1.07887	0.170515	0.754441	0.164	0.050583	0.183392	0.0221158	0.137925	0.0270893	0.0769007	0.0114442	0.0681343	0.010068	3.3649	0.819163	0.7842	1.25296	0.778049
soil extraction	0-30 cm		Oct. 16, 2020	B	µg kg−1	154.81	0.045834	0.138502	0.985832	7.03139	4.09646	0.21365	10.5829	10.083	7.07215	82.0749	0.39233	0.634928	0.108799	0.503171	0.110664	0.0297818	0.114266	0.014944	0.0894495	0.0173992	0.0517582	0.00756235	0.0468307	0.00719791	2.12908	0.779629	0.7204	1.14299	0.829034
soil extraction	0-30 cm		Oct. 16, 2020	C	µg kg−1	18.7012	0.0965509	0.474345	2.98255	8.91544	24.334	2.95714	11.5501	33.6907	10.9808	10.2335	1.67557	3.47356	0.475037	1.98858	0.421503	0.0932222	0.440884	0.0555509	0.320955	0.0617239	0.166268	0.0226354	0.131844	0.0189315	9.34627	0.928966	0.911659	0.932677	0.82443
soil extraction	30-50 cm		Oct. 16, 2020	A	µg kg−1	36.0158	0.0566844	0.69154	4.9066	5.08821	33.0643	2.28854	11.4056	79.2972	9.2705	10.2362	3.93806	5.90173	1.55914	7.24052	1.57573	0.343792	1.56466	0.203545	1.14662	0.215209	0.579603	0.0759734	0.447225	0.0670444	24.8589	0.8485	0.540506	0.946531	0.848777
soil extraction	30-50 cm		Oct. 16, 2020	B	µg kg−1	138.554	0.0234097	0.286611	2.2468	2.88089	6.72881	0.416407	9.94159	43.2413	2.90647	64.4858	1.05083	1.81454	0.270868	1.1303	0.237082	0.0603421	0.234431	0.0300389	0.174779	0.0333829	0.091572	0.0134617	0.0823014	0.012338	5.23627	0.959696	0.799525	1.10668	0.829851
soil extraction	30-50 cm		Oct. 16, 2020	C	µg kg−1	12.1686	0.0255915	0.399293	3.30696	4.35634	10.545	0.937474	7.50284	56.8536	4.30109	5.84839	1.64394	3.09344	0.546078	2.26353	0.478653	0.101845	0.448762	0.0622901	0.330856	0.0622599	0.1655	0.0239854	0.136591	0.0207272	9.37845	0.959881	0.755751	0.951683	0.903294
soil solution			Oct. 21, 2020	A	µg L−1	41.2905	0.0217575	0.226205	0.513238	5.09174	2.03255	0.000536082	92.2476	0.343745	3.83083	338.138	0.0304757	0.0428278	0.0089411	0.0515016	0.0131481	0.00263796	0.0147065	0.00115145	0.0138704	0.00330554	0.00995164	0.00145428	0.00992542	0.00166496	0.205562	0.422842	0.60632	0.814926	0.45483
soil solution			Oct. 21, 2020	B	µg L−1	26.516	0.0236111	0.20327	0.487236	4.82379	0.850545	0.000536082	94.6112	0.249378	3.37896	125.152	0.0289899	0.0252366	0.00931794	0.0514605	0.0115635	0.00261154	0.0153407	0.00105982	0.0119648	0.00259588	0.00810054	0.00125335	0.00961461	0.0014179	0.180528	0.448359	0.356461	0.829657	0.438653
soil solution			Oct. 21, 2020	C	µg L−1	29.235	0.0243695	0.220359	0.491754	6.83803	1.9907	0.0412216	88.5994	0.867528	3.46996	201.026	0.0560563	0.0977646	0.0173772	0.0878088	0.0202618	0.00380542	0.0196553	0.00188827	0.0154566	0.00339003	0.0104578	0.00153027	0.0104422	0.00170615	0.347601	0.635599	0.729278	0.825036	0.607752
soil solution			Nov. 16, 2020	A	µg L−1	16.0386	0.0188919	0.161899	0.54114	5.01906	0.769379	0.00198558	81.073	0.368084	3.52508	161.502	0.0373097	0.0392282	0.0125901	0.0695537	0.016979	0.00371272	0.0203551	0.00120149	0.0142206	0.00339107	0.0105361	0.00153243	0.0102709	0.00169521	0.242576	0.516826	0.41835	0.853369	0.392993
soil solution			Nov. 16, 2020	B	µg L−1	21.8356	0.01768	0.136146	0.359452	4.29866	0.563938	0.000536082	70.8743	0.241773	2.90029	107.477	0.0466955	0.0317631	0.0140695	0.0792263	0.019484	0.00439553	0.0206974	0.00148199	0.0143614	0.00326726	0.0103156	0.00149853	0.0101705	0.0015402	0.258967	0.598747	0.289098	0.94326	0.478084
soil solution			Nov. 16, 2020	C	µg L−1	14.314	0.0249007	0.161672	0.455191	7.36737	1.38948	0.051623	73.0207	0.888895	2.94594	142.677	0.0669404	0.0955496	0.0211656	0.101709	0.0229461	0.00517349	0.0239028	0.00198016	0.0184792	0.00373218	0.0106049	0.00163248	0.0112099	0.00175748	0.386783	0.693652	0.59009	0.952951	0.52806
soil solution			Dec. 15, 2020	A	µg L−1	23.0347	0.0271388	0.166019	0.52439	4.46094	4.04735	0.100902	84.4781	1.33237	3.09007	120.419	0.107244	0.181919	0.0324759	0.152825	0.0351897	0.00790036	0.0376658	0.00382208	0.0289816	0.00567974	0.0166904	0.00246807	0.0152913	0.00244534	0.630597	0.708432	0.718886	0.934755	0.648177
soil solution			Dec. 15, 2020	B	µg L−1	20.4123	0.0170349	0.110349	0.305878	3.55509	0.793107	0.0254886	72.5951	0.47805	2.39539	108.189	0.0518808	0.0538574	0.0162861	0.0815481	0.0182882	0.00443723	0.0222177	0.001898	0.0166212	0.00339945	0.0106179	0.0013656	0.0107843	0.00150252	0.294705	0.598408	0.430953	0.939541	0.552436
soil solution			Dec. 15, 2020	C	µg L−1	16.8963	0.0318045	0.231081	0.633963	10.7688	8.86611	0.478868	63.7481	3.67353	3.27173	151.8	0.2557	0.570619	0.0748853	0.312935	0.0671647	0.0143411	0.0679444	0.00760724	0.0492219	0.00913804	0.0264446	0.00362037	0.0224925	0.00318672	1.4853	0.939845	0.963782	0.917055	0.734113
soil solution			Jan. 14, 2021	A	µg L−1	18.674	0.0232341	0.153268	0.708047	4.10247	3.23109	0.0468593	79.0673	0.77334	2.48889	96.2121	0.0543804	0.0702985	0.0168954	0.0857218	0.0207864	0.00463152	0.0225067	0.00173958	0.0179798	0.00370401	0.0106733	0.00155432	0.0101259	0.00173804	0.322736	0.618567	0.53986	0.92176	0.485522
soil solution			Jan. 14, 2021	B	µg L−1	19.3009	0.020908	0.146526	0.289484	3.08244	2.81976	0.0457546	78.5032	0.323765	1.7697	73.7898	0.0596715	0.0641337	0.0194179	0.0955441	0.023173	0.0049313	0.0251171	0.00255936	0.0208268	0.00491736	0.0139849	0.00197424	0.0125195	0.00184867	0.350619	0.551975	0.436927	0.879829	0.629327
soil solution			Jan. 14, 2021	C	µg L−1	16.6174	0.0232919	0.120009	0.347775	5.37106	2.19964	0.265092	63.5698	0.948704	2.28119	85.7228	0.067345	0.114751	0.0211541	0.0992274	0.0189884	0.00467202	0.0236364	0.0017354	0.0168499	0.00342615	0.010443	0.00134281	0.0091437	0.00150664	0.394222	0.731585	0.7071	0.939177	0.484701
soil solution			Feb, 4, 2021	A	µg L−1	25.5256	0.0163824	0.104865	0.404896	3.22425	0.971849	0.0334738	83.7759	0.673092	2.82228	227.266	0.0443385	0.0623369	0.0137269	0.0677839	0.0166197	0.0040004	0.0202985	0.00143182	0.0139911	0.00328203	0.009529	0.00134025	0.0093267	0.001569	0.269575	0.581877	0.588335	0.929163	0.472277
soil solution			Feb, 4, 2021	B	µg L−1	30.1238	0.0192659	0.138591	0.541953	2.91157	4.31813	0.0363231	87.5413	0.533067	2.68325	350.441	0.0591944	0.0744008	0.0175378	0.0859334	0.0196144	0.00378362	0.0187223	0.00156882	0.0164	0.00330788	0.00981033	0.00144699	0.00807727	0.00136095	0.321159	0.682412	0.539302	0.854684	0.504444
soil solution			Feb, 4, 2021	C	µg L−1	19.4858	0.021362	0.140565	0.405567	4.11517	2.07913	0.0341324	76.6032	0.63562	2.58372	108.79	0.0527602	0.0744887	0.0162698	0.0793029	0.0185323	0.00365287	0.0177687	0.000949943	0.0140949	0.00300713	0.00814843	0.00108414	0.00775454	0.00117362	0.298988	0.751906	0.592149	0.871265	0.336897
snow			Jan. 14, 2021		µg L−1	1.68835	0.028137	0.102012	0.659639	2.75394	9.73112	1.2409	1.47524	1.84223	0.431851	33.6862	0.143621	0.335913	0.04083	0.172785	0.0400366	0.00850177	0.039393	0.00468913	0.0319692	0.00566636	0.0153838	0.00182601	0.0133503	0.00152916	0.855495	0.93255	1.02699	0.925783	0.742432
